# Supplementary material for: Color image segmentation using multi-level thresholding approach and data fusion techniques: application in the breast cancer cells images
Source: Springer Nature journal article supplement (doi:10.1186/1687-5281-2012-11), 2012-05-17
Supplement: 13640_2011_32_MOESM2_ESM.pdf [file 13640_2011_32_MOESM2_ESM.pdf]

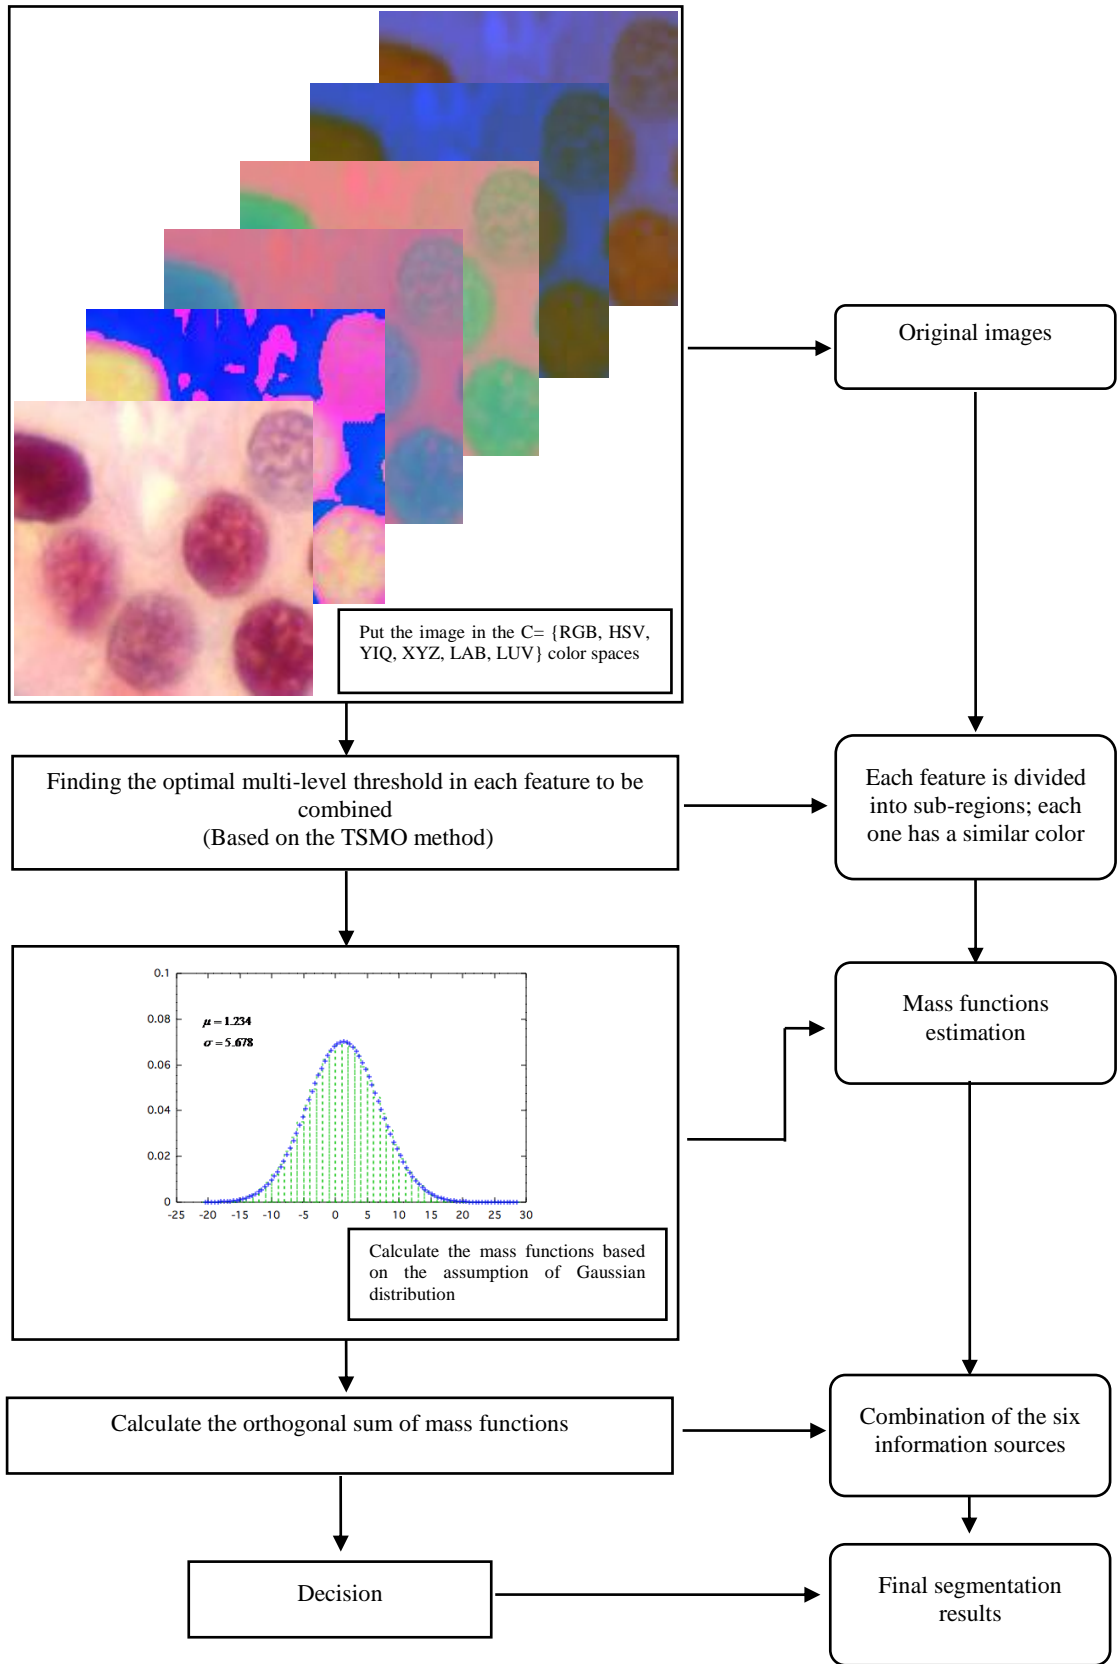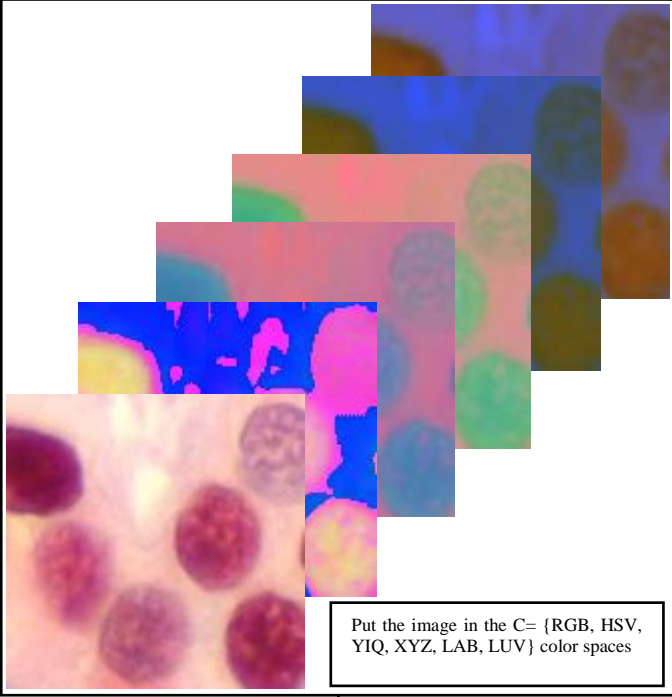

Put the image in the C= {RGB, HSV, YIQ, XYZ, LAB, LUV} color spaces

Finding the optimal multi-level threshold in each feature to be combined  
(Based on the TSMO method)

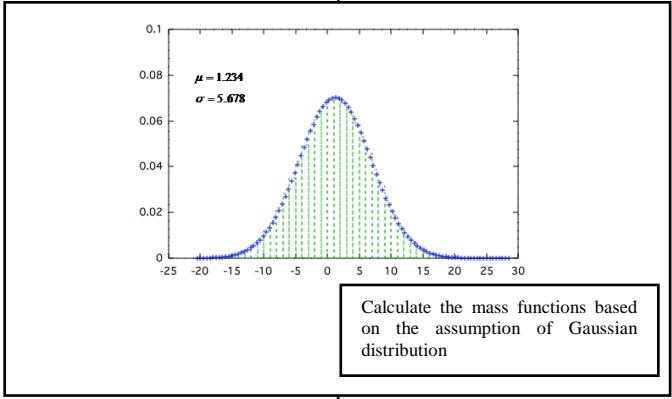

Calculate the mass functions based on the assumption of Gaussian distribution

Calculate the orthogonal sum of mass functions

Decision

Original images

Each feature is divided into sub-regions; each one has a similar color

Mass functions estimation

Combination of the six information sources

Final segmentation results
