# Supplementary material for: Color image segmentation using multi-level thresholding approach and data fusion techniques: application in the breast cancer cells images
Source: Springer Nature journal article supplement (doi:10.1186/1687-5281-2012-11), 2012-05-17

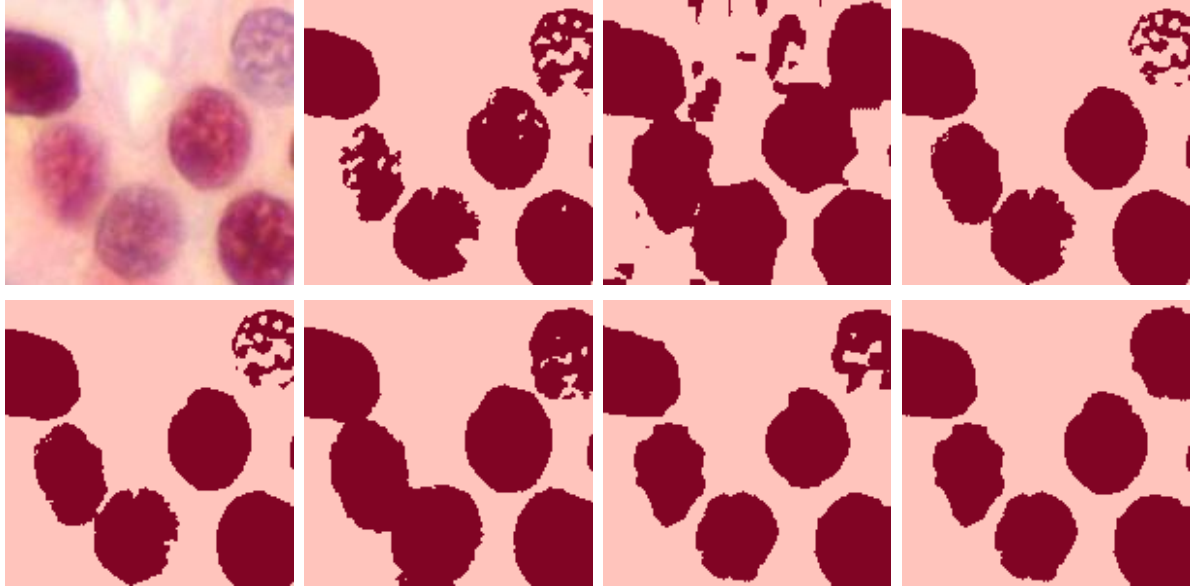

Supplement: 13640_2011_32_MOESM4_ESM.pdf [file 13640_2011_32_MOESM4_ESM.pdf]
