# Supplementary material for: Color image segmentation using multi-level thresholding approach and data fusion techniques: application in the breast cancer cells images
Source: Springer Nature journal article supplement (doi:10.1186/1687-5281-2012-11), 2012-05-17
Supplement: 13640_2011_32_MOESM9_ESM.pdf [file 13640_2011_32_MOESM9_ESM.pdf]

2<sup>nd</sup> feature (H)

|                |             |             |                |
|----------------|-------------|-------------|----------------|
| $C_1 \cup C_2$ | $C_1$       | $C_2$       | $C_1 \cup C_2$ |
| $C_2$          | $\emptyset$ | $C_2$       | $C_2$          |
| $C_1$          | $C_1$       | $\emptyset$ | $C_1$          |

$\cap$        $C_1$        $C_2$        $C_1 \cup C_2$       1<sup>st</sup> feature (R)
